# Supplementary material for: Treatment of mice with S4B6 IL-2 complex prevents lethal toxoplasmosis via IL-12- and IL-18-dependent interferon-gamma production by non-CD4 immune cells
Source: PubMed Central journal article supplement (PMC7403597; doi:10.1038/s41598-020-70102-1), 2020-08-04
Supplement: 41598_2020_70102_MOESM1_ESM.pdf [file 41598_2020_70102_MOESM1_ESM.pdf]

**Treatment of mice with S4B6 IL-2 complex prevents lethal toxoplasmosis via IL-12- and IL-18-dependent interferon-gamma production by non-CD4 immune cells**

Andreas Kupz, Saparna Pai, Paul R. Giacomini, Jennifer A. Whan, Robert Walker, Pierre-Mehdi Hammoudi, Nicholas C. Smith, Catherine M. Miller

**Supplementary Figures and Tables**

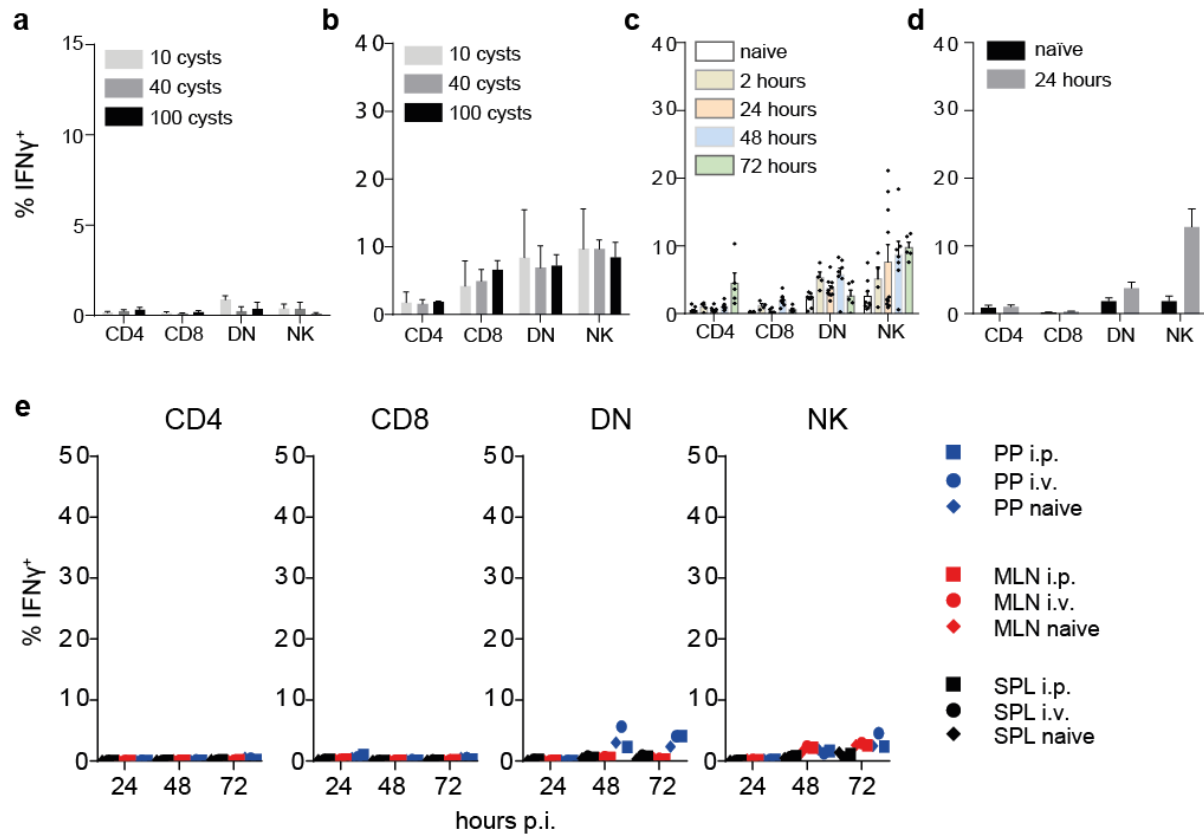

**Figure S1: Low dose injection of *T. gondii* ME49 tachyzoites does not induce rapid IFN- $\gamma$  secretion.** Percent of IFN- $\gamma$ <sup>+</sup> cells amongst total viable CD3<sup>+</sup>CD4<sup>+</sup>, CD3<sup>+</sup>CD8<sup>+</sup>, CD3<sup>+</sup>CD4<sup>-</sup>CD8<sup>-</sup> (DN) T cells and CD3<sup>-</sup>NKp46<sup>+</sup> cells in three Peyer's Patches 1 day (a) or 5 days (b) after B6 mice were inoculated orally with 10, 40 or 100 *T. gondii* ME49 brain cysts, 2-72 hours after mice were injected i.v. with 10<sup>7</sup> *T. gondii* ME49 tachyzoites (c) or 24 hours after mice were infected i.p. with 10<sup>7</sup> *T. gondii* ME49 tachyzoites (d). (e) Percent of IFN- $\gamma$ <sup>+</sup> cells amongst total viable CD3<sup>+</sup>CD4<sup>+</sup>, CD3<sup>+</sup>CD8<sup>+</sup>, CD3<sup>+</sup>CD4<sup>-</sup>CD8<sup>-</sup> (DN) T cells and CD3<sup>-</sup>NKp46<sup>+</sup> cells from spleen, mesenteric lymph nodes or three Peyer's Patches (PP) at 2-72 hours after B6 mice were injected i.p. or i.v. with 10<sup>5</sup> *T. gondii* ME49 tachyzoites. Results are presented as individual data points (e) or pooled data means (a, b, c, d) from two pooled independent experiments with 3-10 mice per group.

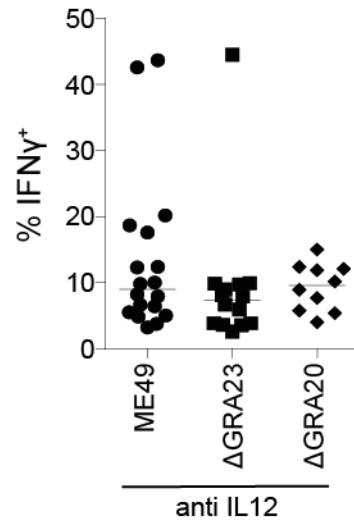

**Figure S2: IL-18 driven IFN- $\gamma$  secretion to *T. gondii* is independent of secreted GRA proteins.** Percent of IFN- $\gamma$ <sup>+</sup> cells amongst total viable splenic CD3<sup>-</sup>NKp46<sup>+</sup> cells in naïve mice 24 hours after i.v. injection of  $10^7$  *T. gondii* ME49, ME49 GRA20-deficient or ME49 GRA23-deficient tachyzoites. Mice were treated with mAb against IL-12 immediately after injection of *T. gondii*. Results are presented as individual data points of 4-15 mice per group from at least two pooled independent experiments.

**Table S1: Statistical comparison for IFN- $\gamma$  positivity shown in Figure 3a.**

|                                                      |                  | <i>C57BL/6</i> |           |                  | <i>Caspase1/11<sup>-/-</sup></i> |           |                  | <i>Nlrp1<sup>-/-</sup></i> |           |                  | <i>Nlrp3<sup>-/-</sup></i> |           |                  | <i>Nlrp1<sup>±/-</sup>Nlrp3<sup>±/-</sup></i> |           |                  |
|------------------------------------------------------|------------------|----------------|-----------|------------------|----------------------------------|-----------|------------------|----------------------------|-----------|------------------|----------------------------|-----------|------------------|-----------------------------------------------|-----------|------------------|
|                                                      |                  | naive          | <i>Tg</i> | <i>Tg</i> +aIL12 | naive                            | <i>Tg</i> | <i>Tg</i> +aIL12 | naive                      | <i>Tg</i> | <i>Tg</i> +aIL12 | naive                      | <i>Tg</i> | <i>Tg</i> +aIL12 | naive                                         | <i>Tg</i> | <i>Tg</i> +aIL12 |
| <b><i>C57BL/6</i></b>                                | Naïve            |                | ****      | ns               | ns                               | ****      | ns               | ****                       | ns        | ns               | ****                       | ns        | ns               | ****                                          | ns        |                  |
|                                                      | <i>Tg</i>        |                |           | ****             | ****                             | ****      | ****             | **                         | ****      | ****             | ***                        | ****      | ****             | ns                                            | ****      |                  |
|                                                      | <i>Tg</i> +aIL12 |                |           |                  | ns                               | ns        | ns               | ns                         | **        | ns               | ns                         | **        | ns               | *                                             | ****      | ns               |
| <b><i>Caspase1/11<sup>-/-</sup></i></b>              | Naïve            |                |           |                  |                                  | ***       | ns               | ns                         | ****      | ns               | ns                         | ****      | ns               | ns                                            | ****      | ns               |
|                                                      | <i>Tg</i>        |                |           |                  |                                  |           | ***              | ***                        | ns        | **               | ****                       | ns        | ns               | ****                                          | ****      | *                |
|                                                      | <i>Tg</i> +aIL12 |                |           |                  |                                  |           | ns               | ****                       | ns        | ns               | ****                       | ns        | ns               | ns                                            | ****      | ns               |
| <b><i>Nlrp1<sup>-/-</sup></i></b>                    | Naïve            |                |           |                  |                                  |           |                  | ****                       | ns        | ns               | ****                       | ns        | ns               | ****                                          | ns        |                  |
|                                                      | <i>Tg</i>        |                |           |                  |                                  |           |                  |                            | ****      | ****             | ns                         | **        | ****             | ***                                           | ***       |                  |
|                                                      | <i>Tg</i> +aIL12 |                |           |                  |                                  |           |                  |                            |           | ns               | ***                        | ns        | ns               | ****                                          | ns        |                  |
| <b><i>Nlrp3<sup>-/-</sup></i></b>                    | Naïve            |                |           |                  |                                  |           |                  |                            |           |                  | ****                       | ns        | ns               | ****                                          | ns        |                  |
|                                                      | <i>Tg</i>        |                |           |                  |                                  |           |                  |                            |           |                  |                            | *         | ****             | ****                                          | **        |                  |
|                                                      | <i>Tg</i> +aIL12 |                |           |                  |                                  |           |                  |                            |           |                  |                            |           | *                | ****                                          | ns        |                  |
| <b><i>Nlrp1<sup>±/-</sup>Nlrp3<sup>±/-</sup></i></b> | Naïve            |                |           |                  |                                  |           |                  |                            |           |                  |                            |           |                  | ****                                          | ns        |                  |
|                                                      | <i>Tg</i>        |                |           |                  |                                  |           |                  |                            |           |                  |                            |           |                  |                                               | ****      |                  |
|                                                      | <i>Tg</i> +aIL12 |                |           |                  |                                  |           |                  |                            |           |                  |                            |           |                  |                                               |           |                  |

*Tg*: *T. gondii*; aIL12: anti-IL12.

Data analysed by Two Way ANOVA followed by Tukey's post hoc test for differences between means: ns =not significant. \* = significant difference at p<0.05; \*\* = significant at p<0.01; \*\*\* = significant at p<0.001; \*\*\*\* = significant difference at p<0.0001

**Table S2: Statistical comparison for serum IL-18 levels shown in Figure 3b.**

|                                                                  |                  | <i>C57BL/6</i> |           |                  | <i>Caspase1/11<sup>-/-</sup></i> |           |                  | <i>Nlrp1<sup>-/-</sup></i> |           |                  | <i>Nlrp3<sup>-/-</sup></i> |           |                  | <i>Nlrp1<sup>±/-</sup>Nlrp3<sup>±/-</sup></i> |           |                  |
|------------------------------------------------------------------|------------------|----------------|-----------|------------------|----------------------------------|-----------|------------------|----------------------------|-----------|------------------|----------------------------|-----------|------------------|-----------------------------------------------|-----------|------------------|
|                                                                  |                  | naive          | <i>Tg</i> | <i>Tg</i> +aIL12 | naive                            | <i>Tg</i> | <i>Tg</i> +aIL12 | naive                      | <i>Tg</i> | <i>Tg</i> +aIL12 | naive                      | <i>Tg</i> | <i>Tg</i> +aIL12 | naive                                         | <i>Tg</i> | <i>Tg</i> +aIL12 |
| <b>C57BL/6</b>                                                   | Naïve            |                | **        | **               | ns                               | ns        | ns               | ns                         | ns        | **               | ns                         | ***       | ****             | ns                                            | ****      | ns               |
|                                                                  | <i>Tg</i>        |                |           | ns               | *                                | **        | ***              | ns                         | ns        | ns               | ns                         | ns        | ***              | *                                             | ns        | ns               |
|                                                                  | <i>Tg</i> +aIL12 |                |           |                  | ns                               | **        | **               | ns                         | ns        | ns               | ns                         | ns        | **               | ns                                            | ns        | ns               |
| <b><i>Caspase1/11<sup>-/-</sup></i></b>                          | Naïve            |                |           |                  |                                  | ns        | ns               | ns                         | ns        | *                | ns                         | **        | ****             | ns                                            | **        | ns               |
|                                                                  | <i>Tg</i>        |                |           |                  |                                  |           | ns               | ns                         | ns        | **               | ns                         | ***       | ****             | ns                                            | ****      | ns               |
|                                                                  | <i>Tg</i> +aIL12 |                |           |                  |                                  |           |                  | ns                         | ns        | **               | ns                         | ***       | ****             | ns                                            | ****      | ns               |
| <b><i>Nlrp1<sup>-/-</sup></i></b>                                | Naïve            |                |           |                  |                                  |           |                  | ns                         | ns        | ns               | ns                         | *         | ****             | ns                                            | **        | ns               |
|                                                                  | <i>Tg</i>        |                |           |                  |                                  |           |                  |                            |           | ns               | ns                         | ns        | **               | ns                                            | ns        | ns               |
|                                                                  | <i>Tg</i> +aIL12 |                |           |                  |                                  |           |                  |                            |           |                  | ns                         | ns        | ns               | *                                             | ns        | ns               |
| <b><i>Nlrp3<sup>-/-</sup></i></b>                                | Naïve            |                |           |                  |                                  |           |                  |                            |           |                  |                            | *         | ****             | ns                                            | **        | ns               |
|                                                                  | <i>Tg</i>        |                |           |                  |                                  |           |                  |                            |           |                  |                            |           | ns               | **                                            | ns        | ns               |
|                                                                  | <i>Tg</i> +aIL12 |                |           |                  |                                  |           |                  |                            |           |                  |                            |           |                  | ****                                          | ns        | ns               |
| <b><i>Nlrp1<sup>±/-</sup></i><br/><i>Nlrp3<sup>±/-</sup></i></b> | Naïve            |                |           |                  |                                  |           |                  |                            |           |                  |                            |           |                  |                                               | ***       | ns               |
|                                                                  | <i>Tg</i>        |                |           |                  |                                  |           |                  |                            |           |                  |                            |           |                  |                                               |           | ns               |
|                                                                  | <i>Tg</i> +aIL12 |                |           |                  |                                  |           |                  |                            |           |                  |                            |           |                  |                                               |           |                  |

*Tg*: *T. gondii*; aIL12: anti-IL12.

Data analysed by Two Way ANOVA followed by Tukey's post hoc test for differences between means: ns =not significant. \* = significant difference at p<0.05; \*\* = significant at p<0.01; \*\*\* = significant at p<0.001; \*\*\*\* = significant difference at p<0.0001
